# Supplementary material for: Ceria nanoparticles immobilized with self-assembling peptide for biocatalytic applications
Source: Royal Society of Chemistry journal article supplement (doi:10.1039/d4nr02672a), 2024-01-01
Supplement: d4nr02672a1.pdf [file d4nr02672a1.pdf]

## Supplementary figures and data

# Ceria nanoparticles immobilized with self-assembling peptide for biocatalytic applications

*Moumita Halder, Vatan Chawla, and Yashveer Singh\**

Department of Chemistry, Indian Institute of Technology Ropar, Rupnagar - 140 001, Punjab,

India

\*Corresponding author. Email: [yash@iitrpr.ac.in](mailto:yash@iitrpr.ac.in)

### Index

| Contents                                                                         | Page # |
|----------------------------------------------------------------------------------|--------|
| <b>Abbreviations</b>                                                             | S2     |
| <b>Fig. S1</b> RP-HPLC of peptide amphiphile (PA).                               | S3     |
| <b>Fig. S2</b> Mass spectrum of peptide amphiphile (PA).                         | S3     |
| <b>Fig. S3</b> <sup>1</sup> H NMR spectrum of peptide amphiphile (PA).           | S4     |
| <b>Fig. S4</b> Circular Dichroism spectrum of peptide amphiphile (PA).           | S4     |
| <b>Fig. S5</b> FT-IR spectra of ceria nanoparticles and peptide amphiphile (PA). | S5     |
| <b>Fig. S6</b> Particle size distribution of nanoparticles.                      | S5     |
| <b>Fig. S7</b> EDX spectra.                                                      | S6     |
| <b>Fig. S8</b> Recyclability of peptide conjugated ceria nanoparticles (TCP).    | S7     |
| <b>Fig. S9</b> Characterization of TCP after fifth catalytic cycle.              | S7     |
| <b>Fig. S10</b> Mechanism of pesticide detection.                                | S8     |
| <b>Fig. S11</b> Cytocompatibility of MC3T3-E1 cells after 7 and 14 days.         | S8     |
| <b>Fig. S12</b> Gene expression analysis by RTPCR.                               | S9     |

|                                                                                                                                                  |     |
|--------------------------------------------------------------------------------------------------------------------------------------------------|-----|
| <b>Table S1</b> Physical properties of nanoparticles.                                                                                            | S10 |
| <b>Table. S2</b> Ratio of Ce <sup>3+</sup> /Ce <sup>4+</sup> estimated using Ce 3d XPS spectrum of peptide-conjugated ceria nanoparticles (TCP). | S11 |
| Reference                                                                                                                                        | S12 |

### **Abbreviations**

**CeNP:** ceria nanoparticles.

**PA:** peptide amphiphile.

**pNPA:** *para*-nitrophenyl acetate.

**pNPP:** *para*-nitrophenyl phosphate.

**TC:** thiolated ceria nanoparticles.

**TCP:** peptide conjugated ceria nanoparticles.

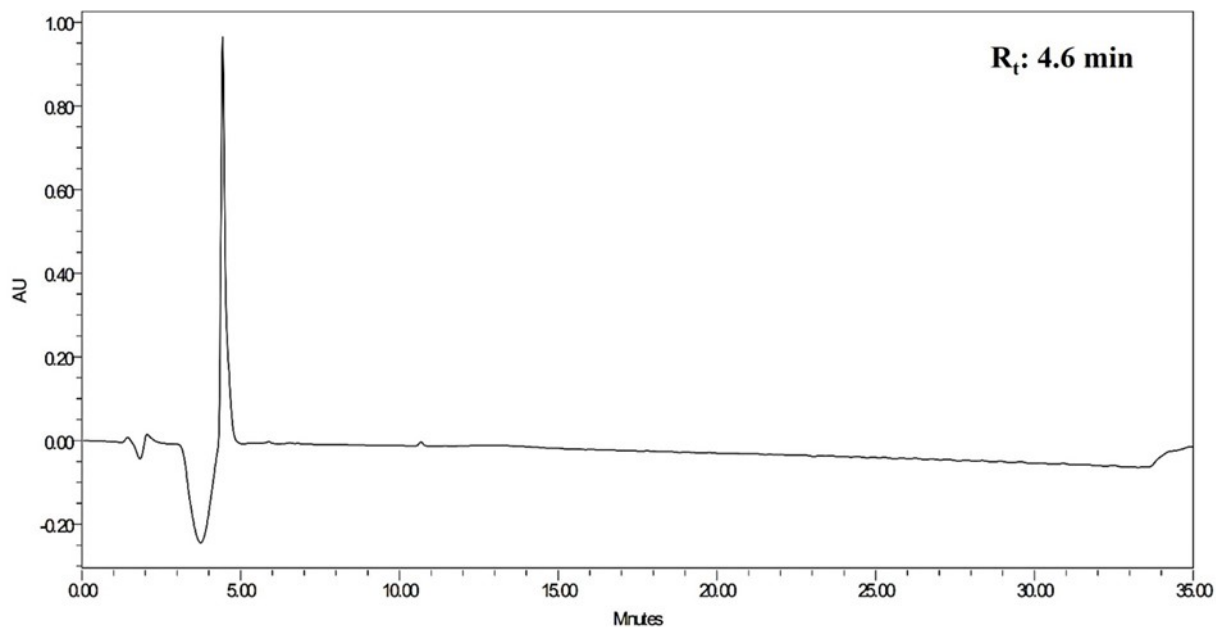

**Fig. S1** RP-HPLC profile of peptide amphiphile (PA).

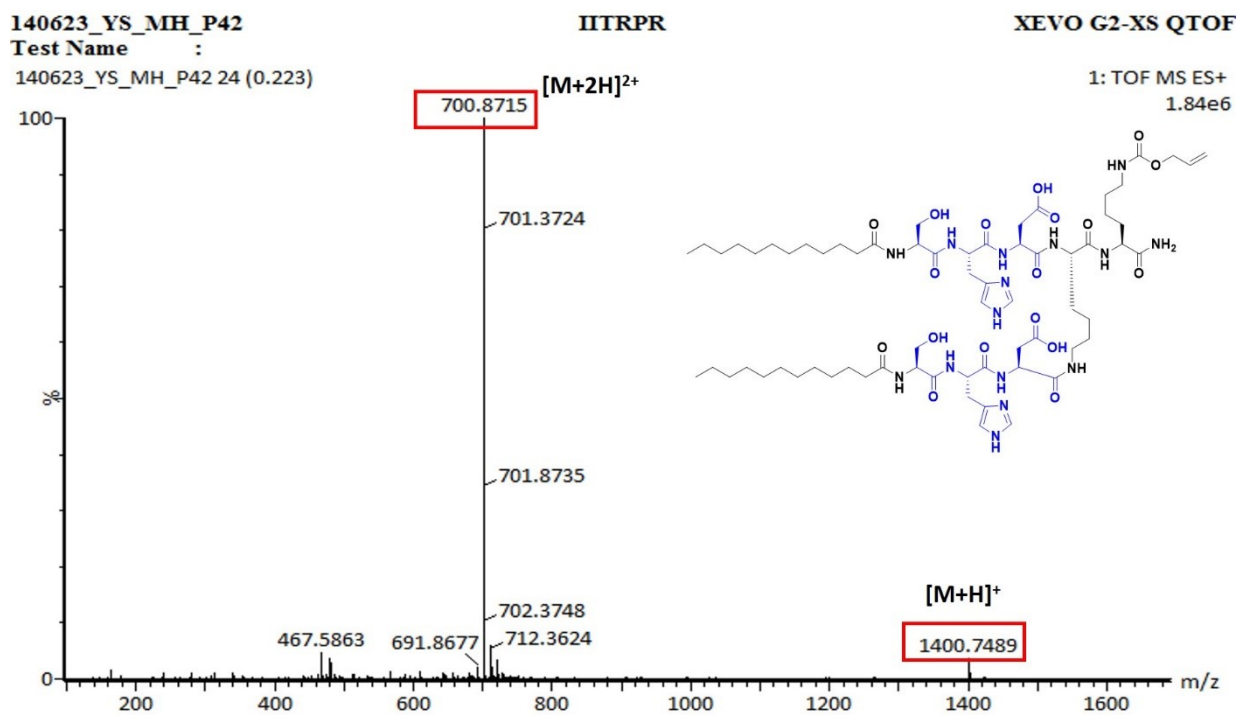

**Fig. S2** Mass spectrum of peptide amphiphile (PA).

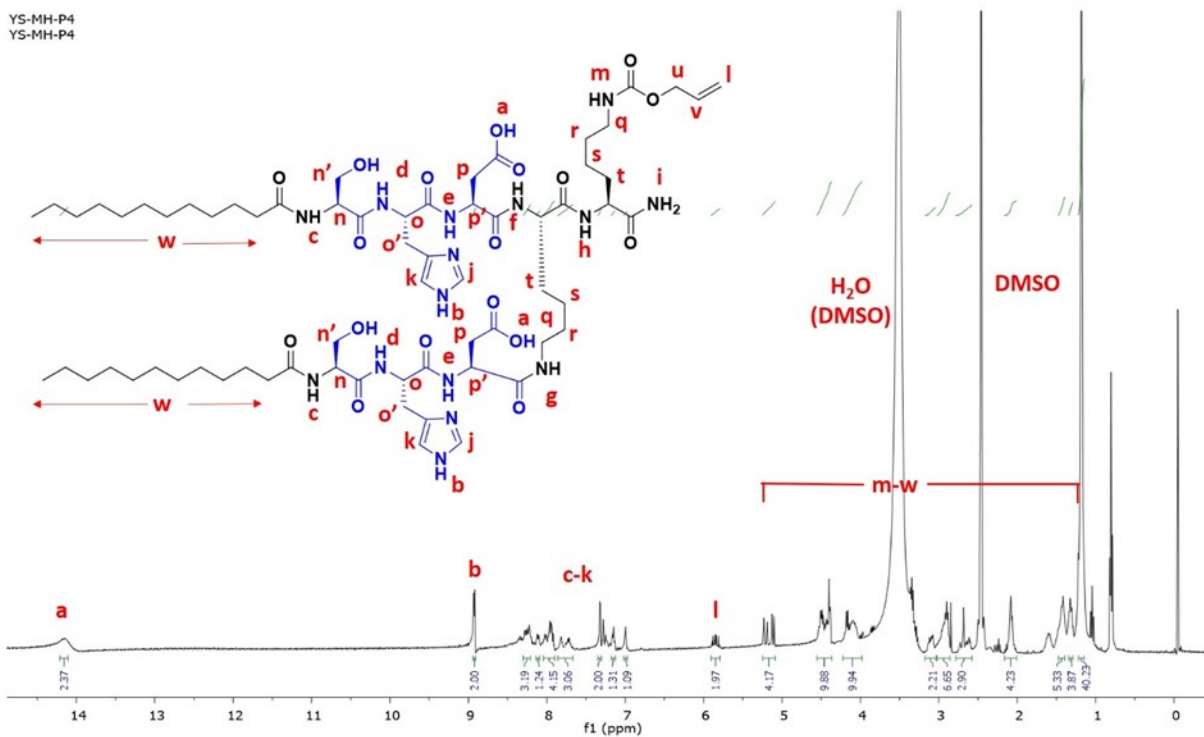

**Fig. S3** <sup>1</sup>H NMR spectrum of peptide amphiphile (PA).

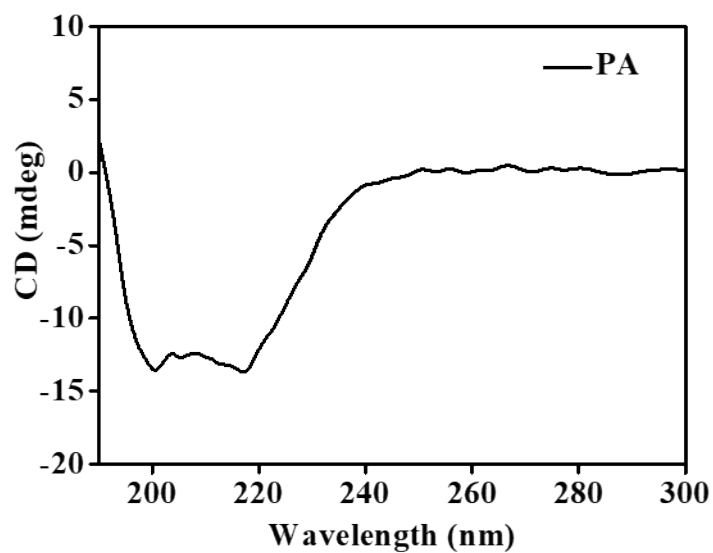

**Fig. S4** Circular Dichroism (CD) spectrum of peptide amphiphile (PA).

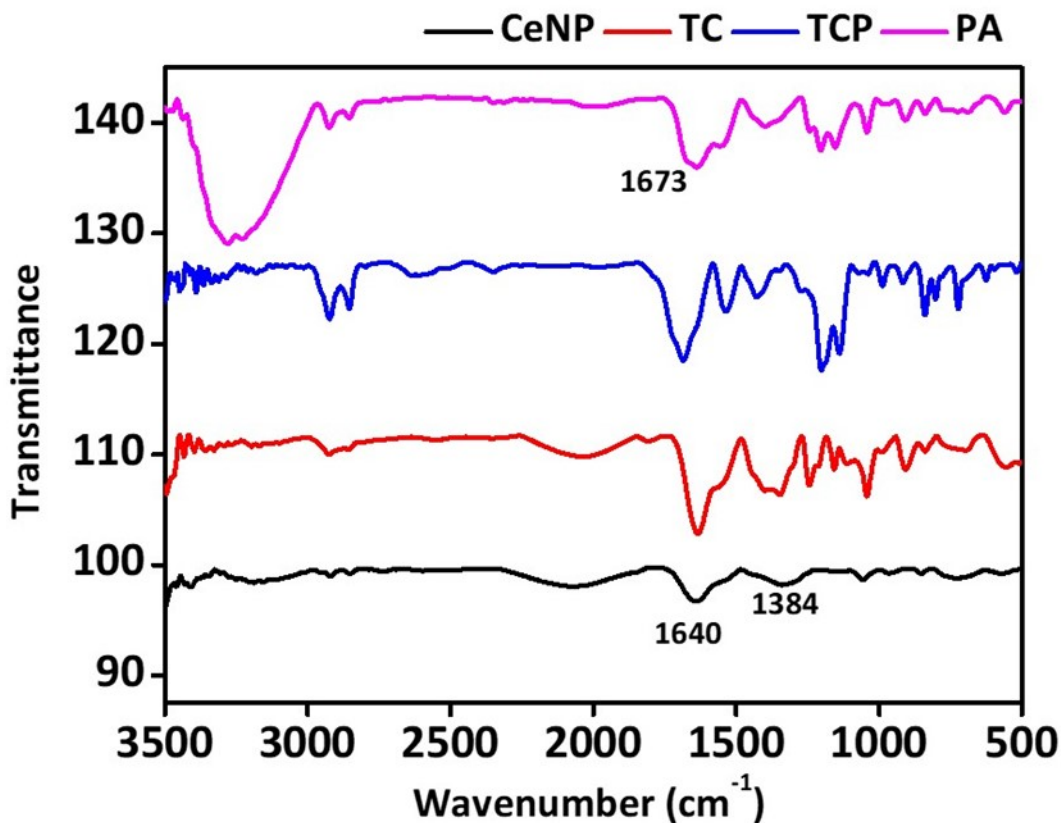

**Fig. S5** FT-IR spectra of ceria nanoparticles (CeNP), thiolated ceria nanoparticles (TC), peptide conjugated ceria nanoparticles (TCP), and peptide amphiphile (PA).

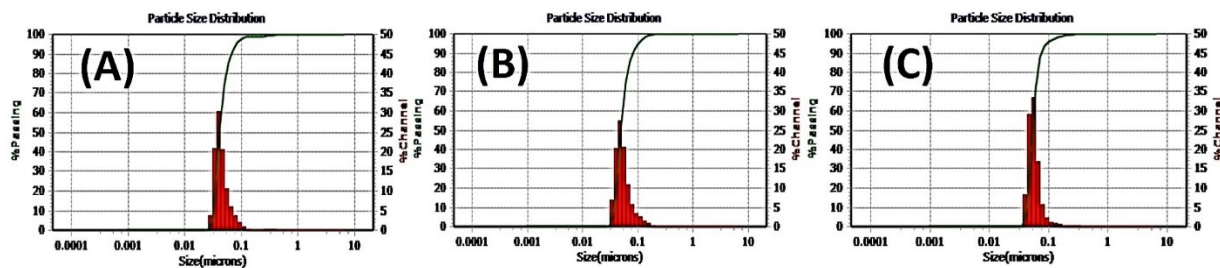

**Fig. S6** Particle size distribution ( $n = 3$ ) using dynamic light scattering (DLS). (A) Ceria nanoparticles (CeNP), (B) Thiolated ceria nanoparticles (TC), and (C) Peptide conjugated ceria nanoparticles (TCP).

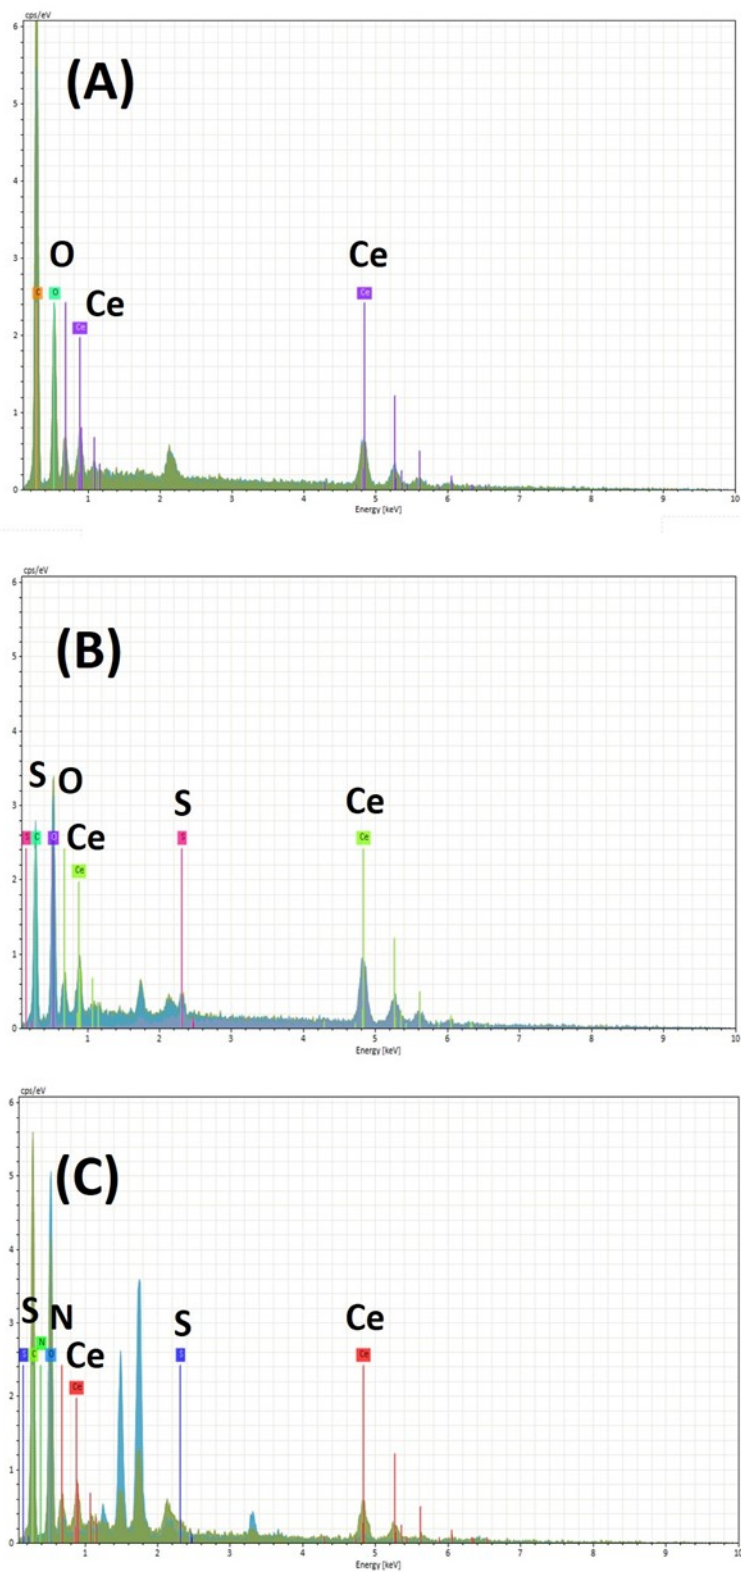

**Fig. S7** EDX spectra of: (A) ceria nanoparticles (CeNP), (B) thiolated ceria nanoparticles (TC), and (C) peptide conjugated ceria nanoparticles (TCP).

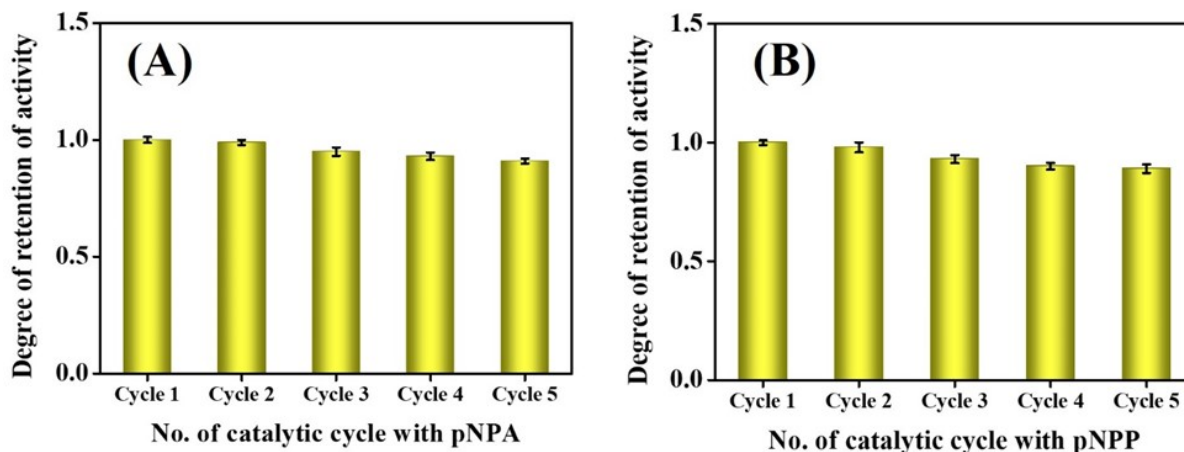

**Fig. S8** Recyclability ( $n = 3$ ) of peptide conjugated ceria nanoparticles (TCP): (A) hydrolysis of *para*-nitrophenyl acetate (pNPA), and (B) hydrolysis of *para*-nitrophenyl phosphate (pNPP). Experiments were performed in triplicates and data are presented as average  $\pm$  SD.

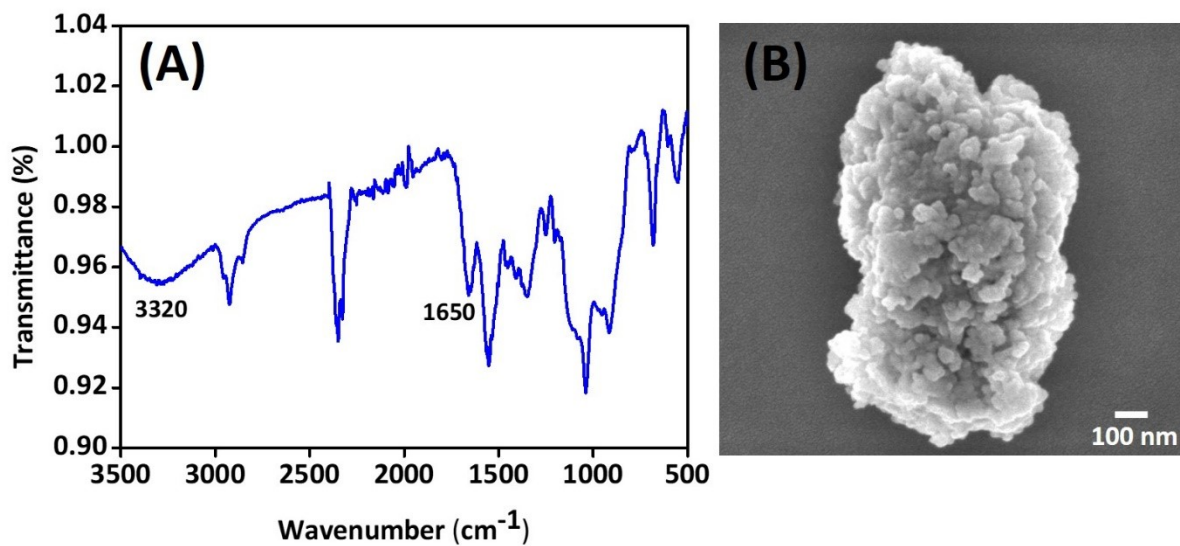

**Fig. S9** Characterization of peptide conjugated ceria nanoparticles (TCP) after fifth catalytic cycle. (A) FT-IR spectra, and (B) FESEM image. Scale bar: 100 nm.

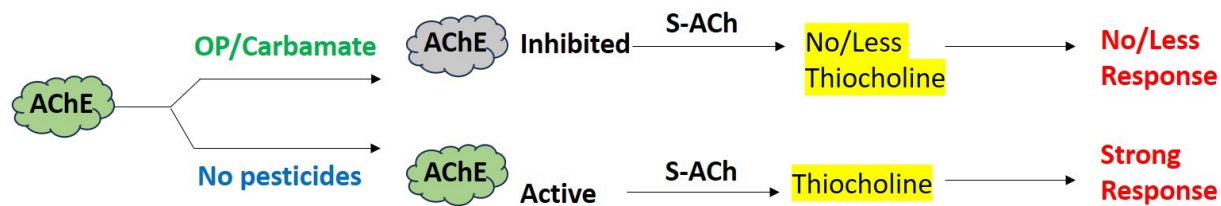

AChE: Acetylcholinesterase; OP: Organophosphate; S-Ach: S-acetylthiocholine

Fig. S10 Mechanism of pesticide detection.<sup>1</sup>

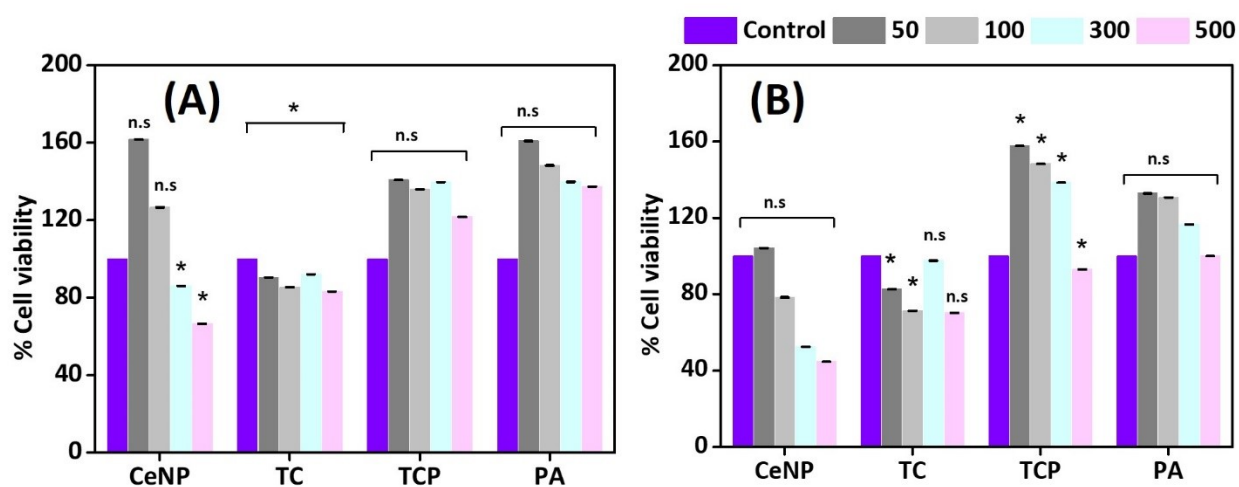

Fig. S11 Cytocompatibility of mesenchymal stem cells (MC3T3-E1) in presence of different concentrations (50, 100, 300, and 1 µg/mL) of nanomaterials, ceria nanoparticles (CeNP), thiolated ceria nanoparticles (TC), peptide conjugated ceria nanoparticles (TCP), and peptide amphiphile (PA), using MTT assay. (A) 7<sup>th</sup> day. (B) 14<sup>th</sup> day. Experiments were performed in triplicates and data are presented as average  $\pm$  SD ( $n = 3$ ), and \* $p < 0.05$  indicates statistically significant data and ns non-significant data.



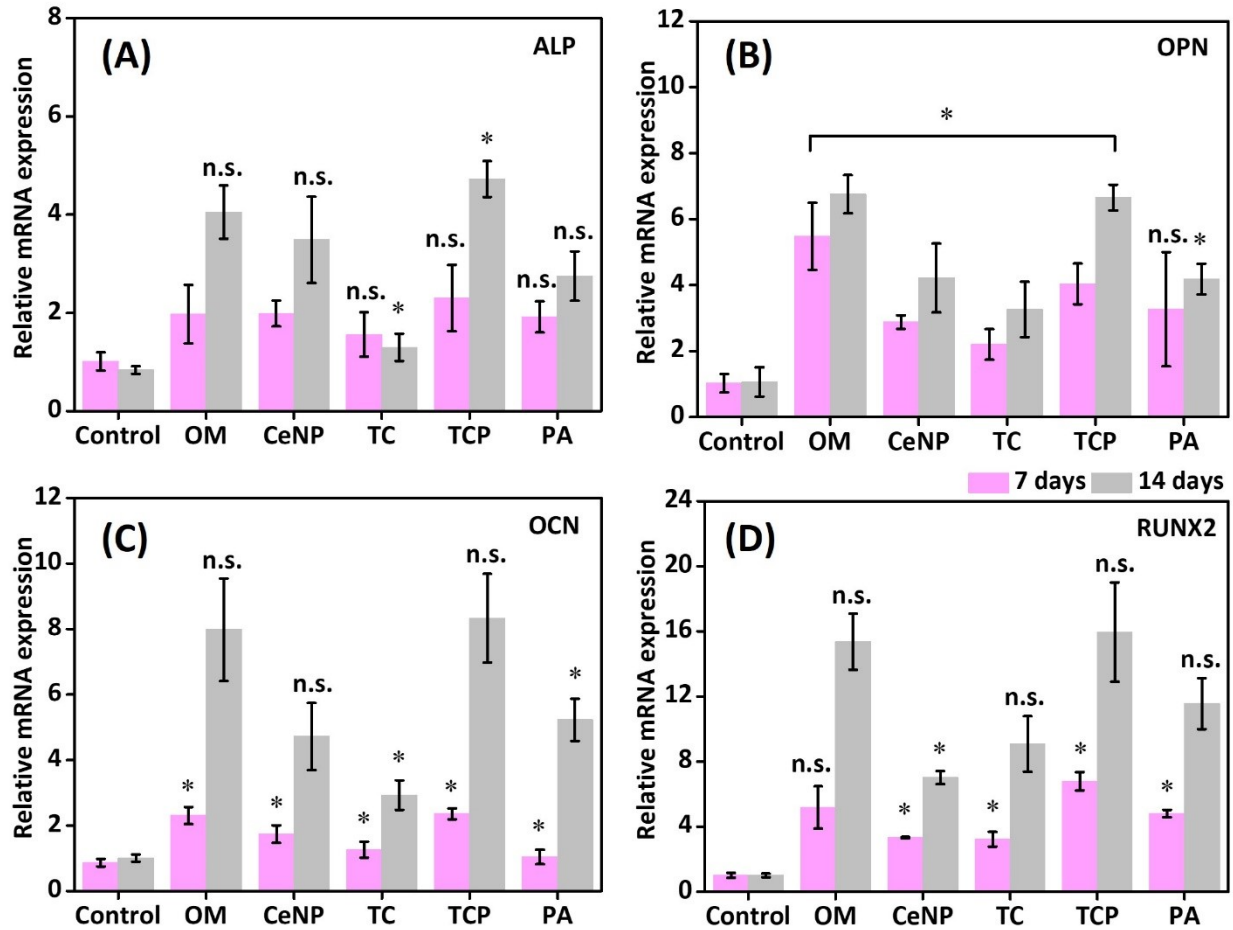

**Fig. S12** Gene expression studies of osteogenic markers, ALP, OPN, OCN, and RUNX2 in mesenchymal stem cells (MC3T3-E1) cultured in osteogenic media (OM) and nanomaterials for 7 and 14 days. Untreated cells were considered as negative control and those treated with OM as positive control. Data are presented as mean  $\pm$  SD,  $n = 3$ , and \* $p < 0.05$  indicates statistically significant data and ns indicates non-significant data.

**Table. S1** Physical properties of ceria nanoparticles (CeNP), thiolated ceria nanoparticles (TC), and peptide conjugated ceria nanoparticles (TCP).

| <b>Sample</b> | <b>Surface area<br/>(m<sup>2</sup>/g)</b> | <b>Pore volume<br/>(cm<sup>3</sup>/g)</b> | <b>Mean pore<br/>diameter (nm)</b> |
|---------------|-------------------------------------------|-------------------------------------------|------------------------------------|
| CeNP          | 1120                                      | 5.3094                                    | 19.034                             |
| TC            | 105                                       | 0.3961                                    | 15.113                             |
| TCP           | 76                                        | 0.2878                                    | 15.172                             |

**Table. S2** Ratio of Ce<sup>3+</sup>/Ce<sup>4+</sup> estimated using Ce 3d XPS spectrum of peptide conjugated ceria nanoparticles (TCP).

| Peaks                 | Binding energy (eV)                                     | Area  |
|-----------------------|---------------------------------------------------------|-------|
| i                     | 882.1                                                   | 18840 |
| ii                    | 884.9                                                   | 16200 |
| iii                   | 888.5                                                   | 13500 |
| iv                    | 898                                                     | 17280 |
| v                     | 900.6                                                   | 12890 |
| vi                    | 903                                                     | 10350 |
| vii                   | 907                                                     | 15670 |
| viii                  | 916.3                                                   | 15750 |
| ii, iv, vi            | Ce <sup>3+</sup>                                        | 43830 |
| i, viii, v, vii, viii | Ce <sup>4+</sup>                                        | 76650 |
|                       | Ce <sup>3+</sup> /Ce <sup>4+</sup>                      | 0.57  |
|                       | Ce <sup>3+</sup> /(Ce <sup>3+</sup> +Ce <sup>4+</sup> ) | 37%   |

## Reference

1. S. Qian and H. Lin, *Anal. Chem.*, 2015, **87**, 5395–5400.
